# Supplementary material for: Polyphase tectonic, thermal and burial history of the Vocontian basin revealed by U–Pb calcite dating
Source: Copernicus journal article supplement (doi:10.5194/se-17-35-2026), 2026-01-09
Supplement: Supplementary file 1 [file se-17-35-2026-supplement.pdf]

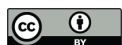

## *Supplement of*

# **Polyphase tectonic, thermal and burial history of the Vocontian basin revealed by U–Pb calcite dating**

**Louise Boschetti et al.**

*Correspondence to:* Louise Boschetti ([louise.boschetti@univ-tlse3.fr](mailto:louise.boschetti@univ-tlse3.fr))

The copyright of individual parts of the supplement might differ from the article licence.

## **Content of this file**

- 1- U-Pb image geochronology
- 2- Table S1: Analytical conditions
- 3- Table S2: Isotopic map characteristics (successfully dated unknowns)
- 4- Figure S1: Tomographic map of the Vocontian Basin

## **Introduction**

These files first contain the analytical method of U-Pb image geochronology used in this study. Then there is Table 1, which shows the analytical conditions; Table 2, which shows the isotopic map characteristics for the dated samples; and a figure, which shows the tomographic map that was used once during the discussion.

## **S1- U-Pb image geochronology**

U-Pb geochronology via the in-situ Laser Ablation Inductively Coupled Mass Spectrometer (LA-ICP-MS) method was conducted at the Institut des Sciences Analytiques et de Physico-Chimie pour l'Environnement et les Matériaux (IPREM) laboratory (Pau, France). The sample (polished chip) was analysed with a femtosecond laser ablation system (Lambda3, Nexeya, Bordeaux, France), coupled to a sector-field ICP-MS Element XR (ThermoFisher Scientific, Bremen, Germany) fitted with the Jet Interface (Table S1), in June 2023. The aerosol produced by the ablation was carried to the ICP-MS by a tube (1/16" internal diameter) using a Helium stream (600 mL min<sup>-1</sup>). Measured wash out time of the ablation cell was ~500-600 ms for helium gas considering the 99% criterion. To improve sensitivity, 10 mL min<sup>-1</sup> of nitrogen was added to the twister spray chamber of the ICP-MS via a tangential inlet while helium flow was introduced via another tangential inlet located at the very top of the spray chamber. Measurements were performed under dry plasma conditions. The fs-LA-ICP-MS coupling was tuned on a daily basis in order to achieve the best compromise in terms of sensitivity, accuracy, particles atomization efficiency and stability. The additional Ar carrier gas flow rate, torch position and power were adjusted so that the U/Th ratio was close to 1 +/-

0.05 when ablating the NIST SRM612 glass. Detector cross-calibration and mass bias calibration were checked daily using the appropriate sequence of the Element Software.

The femtosecond laser operates at an UV wavelength of 257 nm and delivers 360 fs pulses. The laser source was adjusted to operate at a repetition rate of 500 Hz with a fluence of ~2  $\mu\text{J}$  per pulse. Complex trajectories can be realized by moving the laser beam (15  $\mu\text{m}$  diameter) across the surface of the sample using the rapid movement of galvanometric scanners combined with the high repetition rate.

A rapid screening of all samples ( $n = 50$ ) was first realised to select the ones suitable for dating. It consists in monitoring the  $^{238}\text{U}$  and  $^{206}\text{Pb}$  masses at random locations without recording the signal, up to finding areas with  $^{238}\text{U}/^{206}\text{Pb}$  ratios above 1. For the selected samples ( $n = 26$ ), isotopic maps were built at the same location and used for in situ U-Pb dating following the method described in Hoareau et al. (in review). In detail, a blank was first acquired during the duration of a line scan (25 to 239 s). For mapping, lines of 25  $\mu\text{m}$  height, separated by 25  $\mu\text{m}$  so that they are adjacent to each other, were obtained using a back-and-forth movement of the laser (at 5  $\text{mm s}^{-1}$ ) combined with a stage movement rate of 25  $\mu\text{m s}^{-1}$ . They correspond to 25 to 239 s of analysis per linear scan, followed by a 25 s break for the analysed unknown sample. The total analysis time for 7 to 35 linear scans was of ~21 to ~61 min for the maps of a surface of ~0.46 to ~1.84  $\text{mm}^2$  (see Table S2 for successful samples). The ablation depth was about 40  $\mu\text{m}$  as measured with a digital microscope Keyence VH-7000. Before analysis, all samples were pre-cleaned with the laser using a stage movement rate of 200  $\mu\text{m s}^{-1}$ .

The  $^{238}\text{U}$ ,  $^{232}\text{Th}$ ,  $^{208}\text{Pb}$ ,  $^{207}\text{Pb}$ , and  $^{206}\text{Pb}$  masses were selected, reaching a total mass sweep time of about ~78 ms (2024) or ~55 ms (2025). The limits of detection for  $^{206}\text{Pb}$  and  $^{238}\text{U}$  were ~0.14 and ~0.025 ppb in 2024, and ~0.18 and ~0.011 ppb in 2025, respectively, as calculated by Iolite 4 using the equation of Howell et al. (2010).

U-Pb data were processed using Iolite 4 software (Paton et al., 2011) and the VizualAge\_UcomPbine Data Reduction Scheme for background correction and normalization (Chew et al. 2014). After line selection and background correction, NIST SRM614 glass was used as the primary reference material for normalization (mass drift and interelement fractionation) of both Pb/Pb and Pb/U isotope data. Correction of additional matrix-related offset of the  $^{206}\text{Pb}/^{238}\text{U}$  ratio used WC-1 calcite reference material (age  $254.4 \pm 6.4$  Ma), using the method of Roberts et al. (2017). To that end, small maps of the primary RMs ( $\sim 0.1 \text{ mm}^2$ , analysis time of  $\sim 3.5$  min) were produced before and after each analysis of unknown samples (standard bracketing), under conditions like those described above, and corrections calculated from linear interpolations between the analyses. The Duff Brown Tank limestone (Age  $64.04 \pm 0.67$ ; Hill et al., 2016) and AUG-B6, a tectonic calcite vein from the Paris basin (France) dated by U-Pb LA-ICP-MS at about 42 to 43 Ma in several laboratories (Pagel et al., 2018; Blaise et al., 2023), were used as validation reference material. From the 26 samples selected for dating, 18 proved successful. For 9 of these, due to low  $^{238}\text{U}$ ,  $^{206}\text{Pb}$  and/or  $^{207}\text{Pb}$  concentrations, the  $\sim 55/78$  ms dwell times used proved too short, and a significant number of sweeps had zero counts on the monitored Pb masses. After background correction, this resulted in large positive or negative spikes in the calculated Pb/Pb and Pb/U ratios using a mean of ratios approach, resulting in biased age calculations (see Hoareau et al. (in review) for details). To avoid such spikes, all mass counts were averaged over 3 to 8 mass sweeps prior to treatment with Iolite, resulting in a final mass sweep value of  $\sim 220$  to  $440$  ms (Table S2). For consistency across the different samples, this approach was also used for reference materials within a session (e.g., Picazo et al., 2019). A comparison between Pb/Pb and Pb/U ratios obtained for reference materials with and without this initial treatment showed no significant difference. No common lead correction nor downhole fractionation correction were made. The ratio values for each pixel are obtained in the “Imaging” section of Iolite. The software allows the operator to

filter out pixels that are considered anomalous or to select a specific area of the produced isotopic mass. Here, for the unknown samples, pixels with negative counts per second values of  $^{238}\text{U}$ ,  $^{207}\text{Pb}$  and  $^{206}\text{Pb}$  were excluded by default. Additional criteria include removal of pixels with  $^{207}\text{Pb}/^{206}\text{Pb}$  ratios higher than 2 or 2.5 (1-2, 31a and AUG-B6 (10/02/2025)), and  $^{238}\text{U}$ ,  $^{207}\text{Pb}$  and  $^{206}\text{Pb}$  lower than 1000 cps (BON23-01). The resulting number of pixels used for successful age calculation ranges between 3670 and 33091.

An in-house Python script was then used as part of the Python API embedded in Iolite 4. This script as well as the ones described below are publicly available (Hoareau et al., in review). The Python script allows to reconstruct isotopic ratio matrices from pixel values, to add excess variance to individual ratio uncertainties, to correct of matrix-related offset of the  $^{206}\text{Pb}/^{238}\text{U}$  ratio, to split the isotopic image maps into virtual spots forming a grid, and to calculate the mean and its uncertainty for each spot, for all ratios. First, for each virtual spot the mean of ratios is calculated, pixels identified as outliers, if any, are removed (i.e, pixel ratio values outside the 95% confidence interval of the standard error), and the mean recalculated. Second, excess variance calculated by Iolite 4 using all ablation lines of NIST 614 (typically 1.5-2.5% (2s) for  $^{238}\text{U}/^{206}\text{Pb}$  and 0.1-0.3 (2s) for  $^{207}\text{Pb}/^{206}\text{Pb}$ ) is added by quadrature to the uncertainties of each virtual spot obtained from the unknowns (and WC-1) within the session. For correction of the matrix-related offset, the isotopic maps of WC-1 produced in the analytical session (standard bracketing) are split in virtual spots of size like those used on the unknowns. The mean and uncertainty values of  $^{238}\text{U}/^{206}\text{Pb}$  and  $^{207}\text{Pb}/^{206}\text{Pb}$  ratios are then plotted in TW diagrams using IsoplotR (Vermeesch, 2018) to calculate the ages used for correction. After these first steps, virtual spots are calculated for the unknowns. Whereas their minimum height (vertical size) is limited to that a line (25  $\mu\text{m}$ ), their minimum width (horizontal size) can theoretically be as small as that of a few microns (few pixels). The script allows to change the grid location makes it possible to calculate several dozens of ages corresponding to each grid

location. This process allows to assess the homogeneity of the sample in terms of age by using weighted mean statistics, and to select the best age obtained in terms of precision and statistical robustness (MSWD value and p). Finally, virtual spots with high individual uncertainties can be filtered out. In the present study, for the unknown sample the virtual spots displaying uncertainty higher than 30% were removed (15% for BON23-02).

As a final step, ages were calculated with Tera-Wasserburg diagrams generated with an R script using the *age* and *concordia* functions of IsoplotR library. Systematic uncertainties were then added quadratically to the final age. They comprise the decay constant uncertainty of  $^{238}\text{U}$  (0.1 %, 2 s), the  $^{238}\text{U}/^{206}\text{Pb}$  ratio uncertainty of WC1, as estimated by Roberts et al. (2017) (2.7 %, 2 s), and the long-term excess variance taken as 2.0 % (2 s). Ages are quoted directly with the systematic uncertainties.

**Table S1: Analytical conditions**

| Laboratory & Sample Preparation |                                                                                                                                                                                                                            |
|---------------------------------|----------------------------------------------------------------------------------------------------------------------------------------------------------------------------------------------------------------------------|
| Laboratory name                 | Institut des sciences analytiques et de physico-chimie pour l'environnement et les matériaux (IPREM), UPPA, Pau (France)                                                                                                   |
| Sample type/mineral             | Calcite                                                                                                                                                                                                                    |
| Sample preparation              | In situ in thick sections                                                                                                                                                                                                  |
| Imaging                         | Yes                                                                                                                                                                                                                        |
| Laser ablation system           |                                                                                                                                                                                                                            |
| Make, Model & type              | Lambda 3, Nexeya (France)                                                                                                                                                                                                  |
| Ablation cell                   | Home-made (home-designed) two volumes ablation cell. The large cell has a rectangular shape and a volume of 11.25 cm <sup>3</sup> (75 x 25 x 6 mm size) while the small one, placed above the sample is of 10 mm diameter. |
| Laser wavelength (nm)           | 257 nm                                                                                                                                                                                                                     |
| Pulse duration (fs)             | 360 fs                                                                                                                                                                                                                     |
| Fluence (J.cm <sup>-2</sup> )   | 5-8 J.cm <sup>-2</sup>                                                                                                                                                                                                     |
| Repetition rate (Hz)            | 500 Hz                                                                                                                                                                                                                     |
| Gas blank (s)                   | 25 to 239 s per image (1 line)                                                                                                                                                                                             |
| Ablation duration (s)           | 25 to 239 s per line                                                                                                                                                                                                       |

|                                                    |                                                                                                                                                                                                                                                                                                                                                        |
|----------------------------------------------------|--------------------------------------------------------------------------------------------------------------------------------------------------------------------------------------------------------------------------------------------------------------------------------------------------------------------------------------------------------|
| Washout and/or travel time in between analyses (s) | Wash out time ~500-600 ms. 25 s of break between lines to allow data processing.                                                                                                                                                                                                                                                                       |
| Spot diameter (µm)                                 | 15 µm                                                                                                                                                                                                                                                                                                                                                  |
| Sampling mode / pattern                            | Ablation lines (25 µm-height) made by combining laser beam movement across the surface (5 mm/s) and stage movement (25 µm/s). 25 µm between lines.                                                                                                                                                                                                     |
| Cell Carrier gas (L/min)                           | He = 0.600 L/min                                                                                                                                                                                                                                                                                                                                       |
| <b>ICP-MS Instrument</b>                           |                                                                                                                                                                                                                                                                                                                                                        |
| Make, Model & type                                 | ICPMS Thermo Fisher ElementXR HR Jet Interface                                                                                                                                                                                                                                                                                                         |
| RF power (W)                                       | 1000 - 1100W                                                                                                                                                                                                                                                                                                                                           |
| Cooling gas flow rate                              | 16 L min <sup>-1</sup>                                                                                                                                                                                                                                                                                                                                 |
| Auxiliary gas flow rate                            | 1 L min <sup>-1</sup>                                                                                                                                                                                                                                                                                                                                  |
| Nebuliser gas flow rate                            | 0.5 L min <sup>-1</sup>                                                                                                                                                                                                                                                                                                                                |
| Masses measured                                    | 206, 207, 208, 232, 238                                                                                                                                                                                                                                                                                                                                |
| Samples per peak                                   | 30                                                                                                                                                                                                                                                                                                                                                     |
| Mass window                                        | 10 %                                                                                                                                                                                                                                                                                                                                                   |
| Sample time                                        | 3 ms                                                                                                                                                                                                                                                                                                                                                   |
| Settling time                                      | 1 ms                                                                                                                                                                                                                                                                                                                                                   |
| Mass sweep                                         | 78 ms (2024) or 55 ms (2025)                                                                                                                                                                                                                                                                                                                           |
| Averaged mass sweep                                | Depends on samples (made during data processing) – by default no                                                                                                                                                                                                                                                                                       |
| Resolution                                         | 300                                                                                                                                                                                                                                                                                                                                                    |
| Sensitivity                                        | Percentage of ions detected with regard to atoms ablated is ~0.04% for U, as calculated with NIST SRM 614                                                                                                                                                                                                                                              |
| <b>Data Processing</b>                             |                                                                                                                                                                                                                                                                                                                                                        |
| Calibration strategy                               | Calibration by standard bracketing; NIST SRM 614 for Pb-Pb and WC-1 calcite for Pb-U                                                                                                                                                                                                                                                                   |
| Reference Material info                            | Primary: NIST SRM 614 - Woodhead and Hergt (2001)<br>WC1: 254.4 ± 6.4 Ma (2s) - Roberts et al., 2017<br>Secondary: Duff Brown 64.04 ± 0.67 Ma (2s) - Hill et al., 2016<br>AUG-B6: ~42-43 Ma - Pagel et al., 2018; Blaise et al., 2023                                                                                                                  |
| Data processing package used / Correction for LIEF | Element XR acquisition software, data processing with Iolite 4 and in-house Python/R code. Age determination through virtual spot discretization.                                                                                                                                                                                                      |
| Common-Pb correction, composition and uncertainty  | No common Pb correction. Excess uncertainty calculated by Iolite (Paton et al., 2011) based on NIST SRM 614 are added to individual uncertainties. Ages in the figures are quoted at 95% absolute uncertainties and include systematic uncertainties (WC1 2.7%, decay constants 0.1%, long-term uncertainty 2%), propagation is by quadratic addition. |
| Quality control / Validation                       | 5 analyses of Duff Brown gave 63.45 ± 2.8 Ma, 69.2 ± 2.6 Ma (anchored to common Pb value of 0.738), 62.9 ± 2.2 Ma (anchored), 63.0 ± 3.3 Ma and 63.3 ± 3.2 Ma.<br>analyses of AUG-B6 gave 42.7 ± 2.1 Ma, 39.8 ± 1.6 Ma, 43.2 ± 2.0 Ma, 45.2 ± 1.7 Ma and 44.5 ± 2.0 Ma.                                                                                |

118

119

120



121 **Table S2: Isotopic map characteristics (successfully dated unknowns)**

| Sample    | Line scan duration (s) | Number of line scans | Duration of mapping (min) | Map dimensions (mm x mm) | Map area (mm <sup>2</sup> ) | Mass sweep duration (ms) | Number of pixels (before filtering) | Number of pixels (after filtering) |
|-----------|------------------------|----------------------|---------------------------|--------------------------|-----------------------------|--------------------------|-------------------------------------|------------------------------------|
| 1-1       | 127.3                  | 15                   | 38.1                      | 3.18 x 0.375             | 1.19                        | 78                       | 24315                               | 24237                              |
| 1-2       | 79.6                   | 18                   | 31.4                      | 1.99 x 0.450             | 0.896                       | 78                       | 18252                               | 17797                              |
| 9a2       | 54.5                   | 24                   | 31.8                      | 0.925 x 0.500            | 0.818                       | 234                      | 5550                                | 5436                               |
| 9b1       | 45                     | 26                   | 30.3                      | 1.36 x 0.600             | 0.731                       | 234                      | 4966                                | 4966                               |
| 11a       | 99.5                   | 27                   | 56.0                      | 1.12 x 0.650             | 1.68                        | 78                       | 13581                               | 13581                              |
| 12a       | 98                     | 30                   | 61.5                      | 2.49 x 0.675             | 1.84                        | 234                      | 12480                               | 12460                              |
| 12b       | 55.2                   | 24                   | 32.1                      | 2.45 x 0.750             | 0.828                       | 234                      | 5850                                | 5788                               |
| 13b       | 82.9                   | 31                   | 55.7                      | 1.38 x 0.600             | 1.61                        | 78                       | 32736                               | 32736                              |
| 14a       | 44.8                   | 35                   | 40.7                      | 2.07 x 0.775             | 0.980                       | 78                       | 19985                               | 19978                              |
| 14b       | 33.8                   | 29                   | 28.4                      | 1.12 x 0.875             | 0.613                       | 234                      | 4176                                | 4052                               |
| 14b-2     | 36.1                   | 21                   | 21.4                      | 0.845 x 0.725            | 0.474                       | 78                       | 9660                                | 9651                               |
| 16d       | 42.8                   | 23                   | 26.0                      | 0.902 x 0.525            | 0.615                       | 78                       | 12535                               | 12535                              |
| 19b       | 59.2                   | 25                   | 35.1                      | 1.48 x 0.625             | 0.925                       | 220                      | 6725                                | 6666                               |
| 22c       | 79.3                   | 23                   | 40.à                      | 1.98 x 0.575             | 1.14                        | 55                       | 33097                               | 33091                              |
| 28b       | 59.5                   | 33                   | 46.5                      | 1.49 x 0.825             | 0.616                       | 55                       | 17888                               | 17867                              |
| 31a       | 239.4                  | 7                    | 30.8                      | 5.98 x 0.175             | 1.05                        | 55                       | 30422                               | 29927                              |
| BON23-01  | 95                     | 21                   | 42.0                      | 2.37 x 0.525             | 1.25                        | 55                       | 36204                               | 27023                              |
| BON23-02  | 58.8                   | 30                   | 41.9                      | 1.47 x 0.750             | 1.10                        | 220                      | 8010                                | 7984                               |
| BON23-03  | 179.6                  | 9                    | 30.7                      | 4.49 x 0.225             | 1.01                        | 440                      | 3672                                | 3670                               |
| GLAN23-02 | 36.9                   | 31                   | 32.0                      | 0.922 x 0.775            | 0.715                       | 220                      | 5208                                | 5208                               |

122  
123  
124  
125  
126  
127  
128  
129  
130  
131  
132  
133  
134

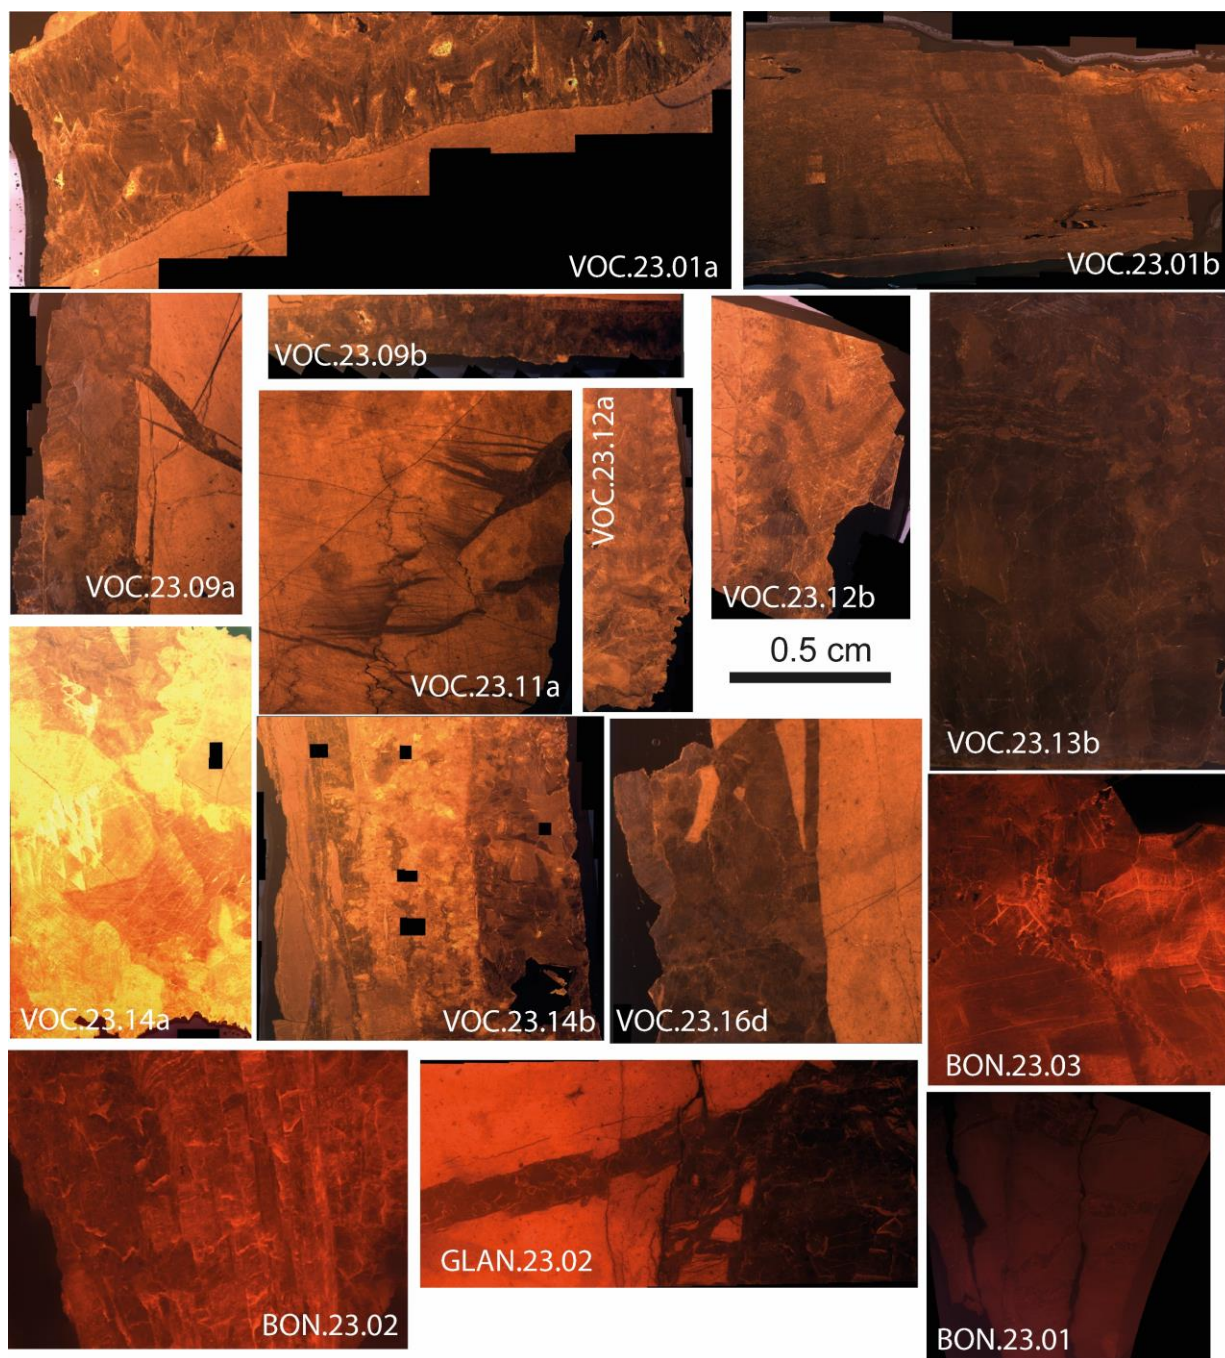

Figure S1: Cathodoluminescence for each dated sample.

135

136

137

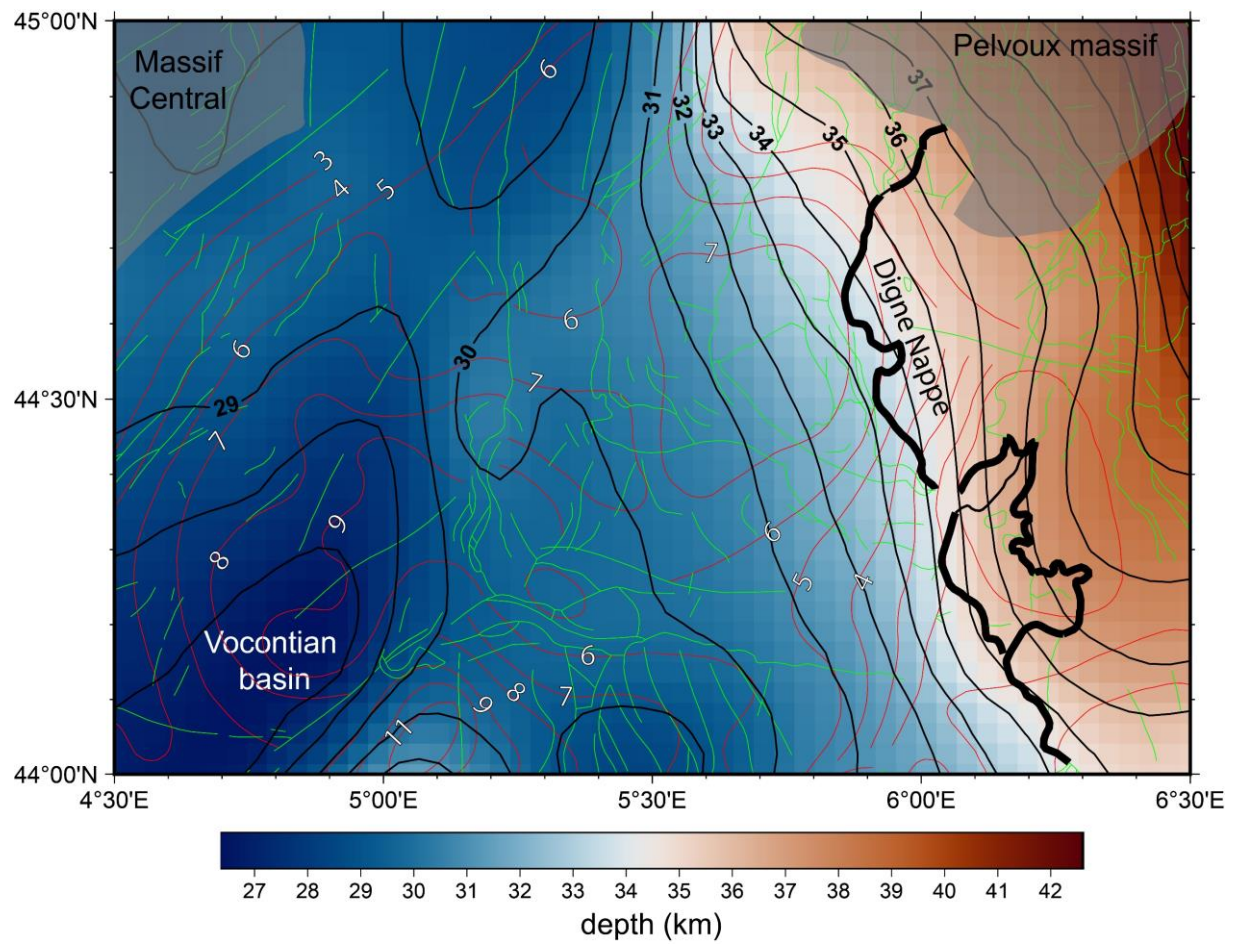

Figure S2: Crustal thickness and the region of the Vocontian Basin. Black line: Moho depth as inferred from Schwartz et al. (2024). Red: Thickness of the base the Trias. Green: Faults. Bold black line: Digne Nappe.

149

150 **References**

- 151 Blaise, T., Augier, R., Bosch, D., Bruguier, O., Cogne, N., Deschamps, P., Guihou, A.,  
152 Haurine, F., Hoareau, G., Nouet, J.: Characterisation and interlaboratory comparison  
153 of a new calcite reference material for U-Pb geochronology - The “AUG-B6” calcite-  
154 cemented hydraulic breccia. 2023 Goldschmidt Conference, 9-14 July, Lyon, France,  
155 2023.
- 156 Chew, D. M., Petrus, J. A., Kamber, B. S.: U-Pb LA-ICPMS dating using accessory  
157 mineral standards with variable common Pb. *Chem. Geol.*, 363, 185-199, 2014
- 158 Hill, C. A., Polyak, V. J., Asmerom, Y., Provencio, P.: Constraints on a Late  
159 Cretaceous uplift, denudation, and incision of the Grand Canyon region, southwestern  
160 Colorado Plateau, USA, from U-Pb dating of lacustrine limestone. *Tectonics*, 35, 896-  
161 906, 2014
- 162 Hoareau, G., Claverie, F., Pecheyran, C., Barbotin, G., Perk, M., Beaudoin, N., Lacroix, B.,  
163 Rasbury, T.: The virtual spot approach: a simple method for image U-Pb carbonate  
164 geochronology by high-repetition rate LA-ICP-MS. *EGUsphere* [preprint],  
165 <https://doi.org/10.5194/egusphere-2024-2366>, in review
- 166 Howell, D., Griffin, W.L., Pearson, N.J., Powell, W., Wieland, P., O'Reilly, S.Y.: Trace  
167 element partitioning in mixed-habit diamonds, *Chem. Geol.*, 355, 134-143, 2013.
- 168 Pagel, M., Bonifacie, M., Schneider, D., Gautheron, C., Brigaud, B., Calmels, D., and  
169 Chaduteau, C., 2018. Improving paleohydrological and diagenetic reconstructions in  
170 calcite veins and breccia of a sedimentary basin by combining  $\Delta 47$  temperature,  
171  $\delta^{18}\text{O}_{\text{water}}$  and U-Pb age, *Chem. Geol.*, 481, 1-17.  
172 <https://doi.org/10.1016/j.chemgeo.2017.12.026>, 2018, 2018.
- 173 Paton, C., Hellstrom, J., Paul, B., Woodhead, J., Hergt, J.: *Iolite*: Freeware for the

visualisation and processing of mass spectrometric data. *Journal of Analytical Atomic Spectrometry*, 26, 2508, doi:10.1039/c1ja10172b, 2011.

Picazo, S.M., Ewing, T.A., Müntener, O, 2019. Paleocene metamorphism along the Pennine–Austroalpine suture constrained by U–Pb dating of titanite and rutile (Malenco, Alps). *Swiss J Geosci* 112, 517–542., 2019.

Roberts, N.M., Rasbury, E.T., Parrish, R.R., Smith, C.J., Horstwood, M.S., Condon, D.J.: A calcite reference material for LA-ICP-MS U-Pb geochronology. *Geochem., Geophys., Geosyst.*, 18, 2807-2814, 2017.

Schwartz, S., Rolland, Y., Nouibat, A., Boschetti, L., Bienveignant, D., Dumont, T., ... & Mouthereau, F.: Role of mantle indentation in collisional deformation evidenced by deep geophysical imaging of Western Alps. *Communications Earth & Environment*, 5(1), 17. <https://doi.org/10.1038/s43247-023-01180-y>, 2024.

Vermeesch, P.: IsoplotR: A free and open toolbox for geochronology. *Geosci. Front.*, 9, 1479-1493, 2018.

Woodhead, J.D., Hergt, J.M.: Strontium, neodymium and lead isotope analyses of NIST glass certified reference materials: SRM 610, 612, 614. *Geostand. Newslett.*, 25, 261-266, 2001.
